# Supplementary material for: A survey of the sperm whale (Physeter catodon) commensal microbiome
Source: PubMed Central journal article supplement (PMC6612419; doi:10.7717/peerj.7257), 2019-07-04
Supplement: peerj-07-7257-s005.pdf [file peerj-07-7257-s005.pdf]

## Stranding

Rescues

Necropsy

## Sampling

Blood

Muscle

Fecal

## Sequencing

Meta-genomic sequences

16S rDNA sequences

## Data analysis

Filter

Assembly

Taxonomy

Species abundance

Filter

Taxonomy

OUT Table

$\beta$ -diversity
