# Supplementary material for: A survey of the sperm whale (Physeter catodon) commensal microbiome
Source: PubMed Central journal article supplement (PMC6612419; doi:10.7717/peerj.7257), 2019-07-04

M B S

1500

1000

900

800

700

600

500

400

300

200

100

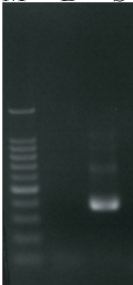

Supplement: peerj-07-7257-s006.pdf [file peerj-07-7257-s006.pdf]
